# Supplementary material for: Development of a High-Density Genetic Map for Muscadine Grape Using a Mapping Population from Selfing of the Perfect-Flowered Vine ‘Dixie’
Source: MDPI journal article supplement (doi:10.3390/plants11233231), 2022-11-25
Supplement: s1 [file s1]

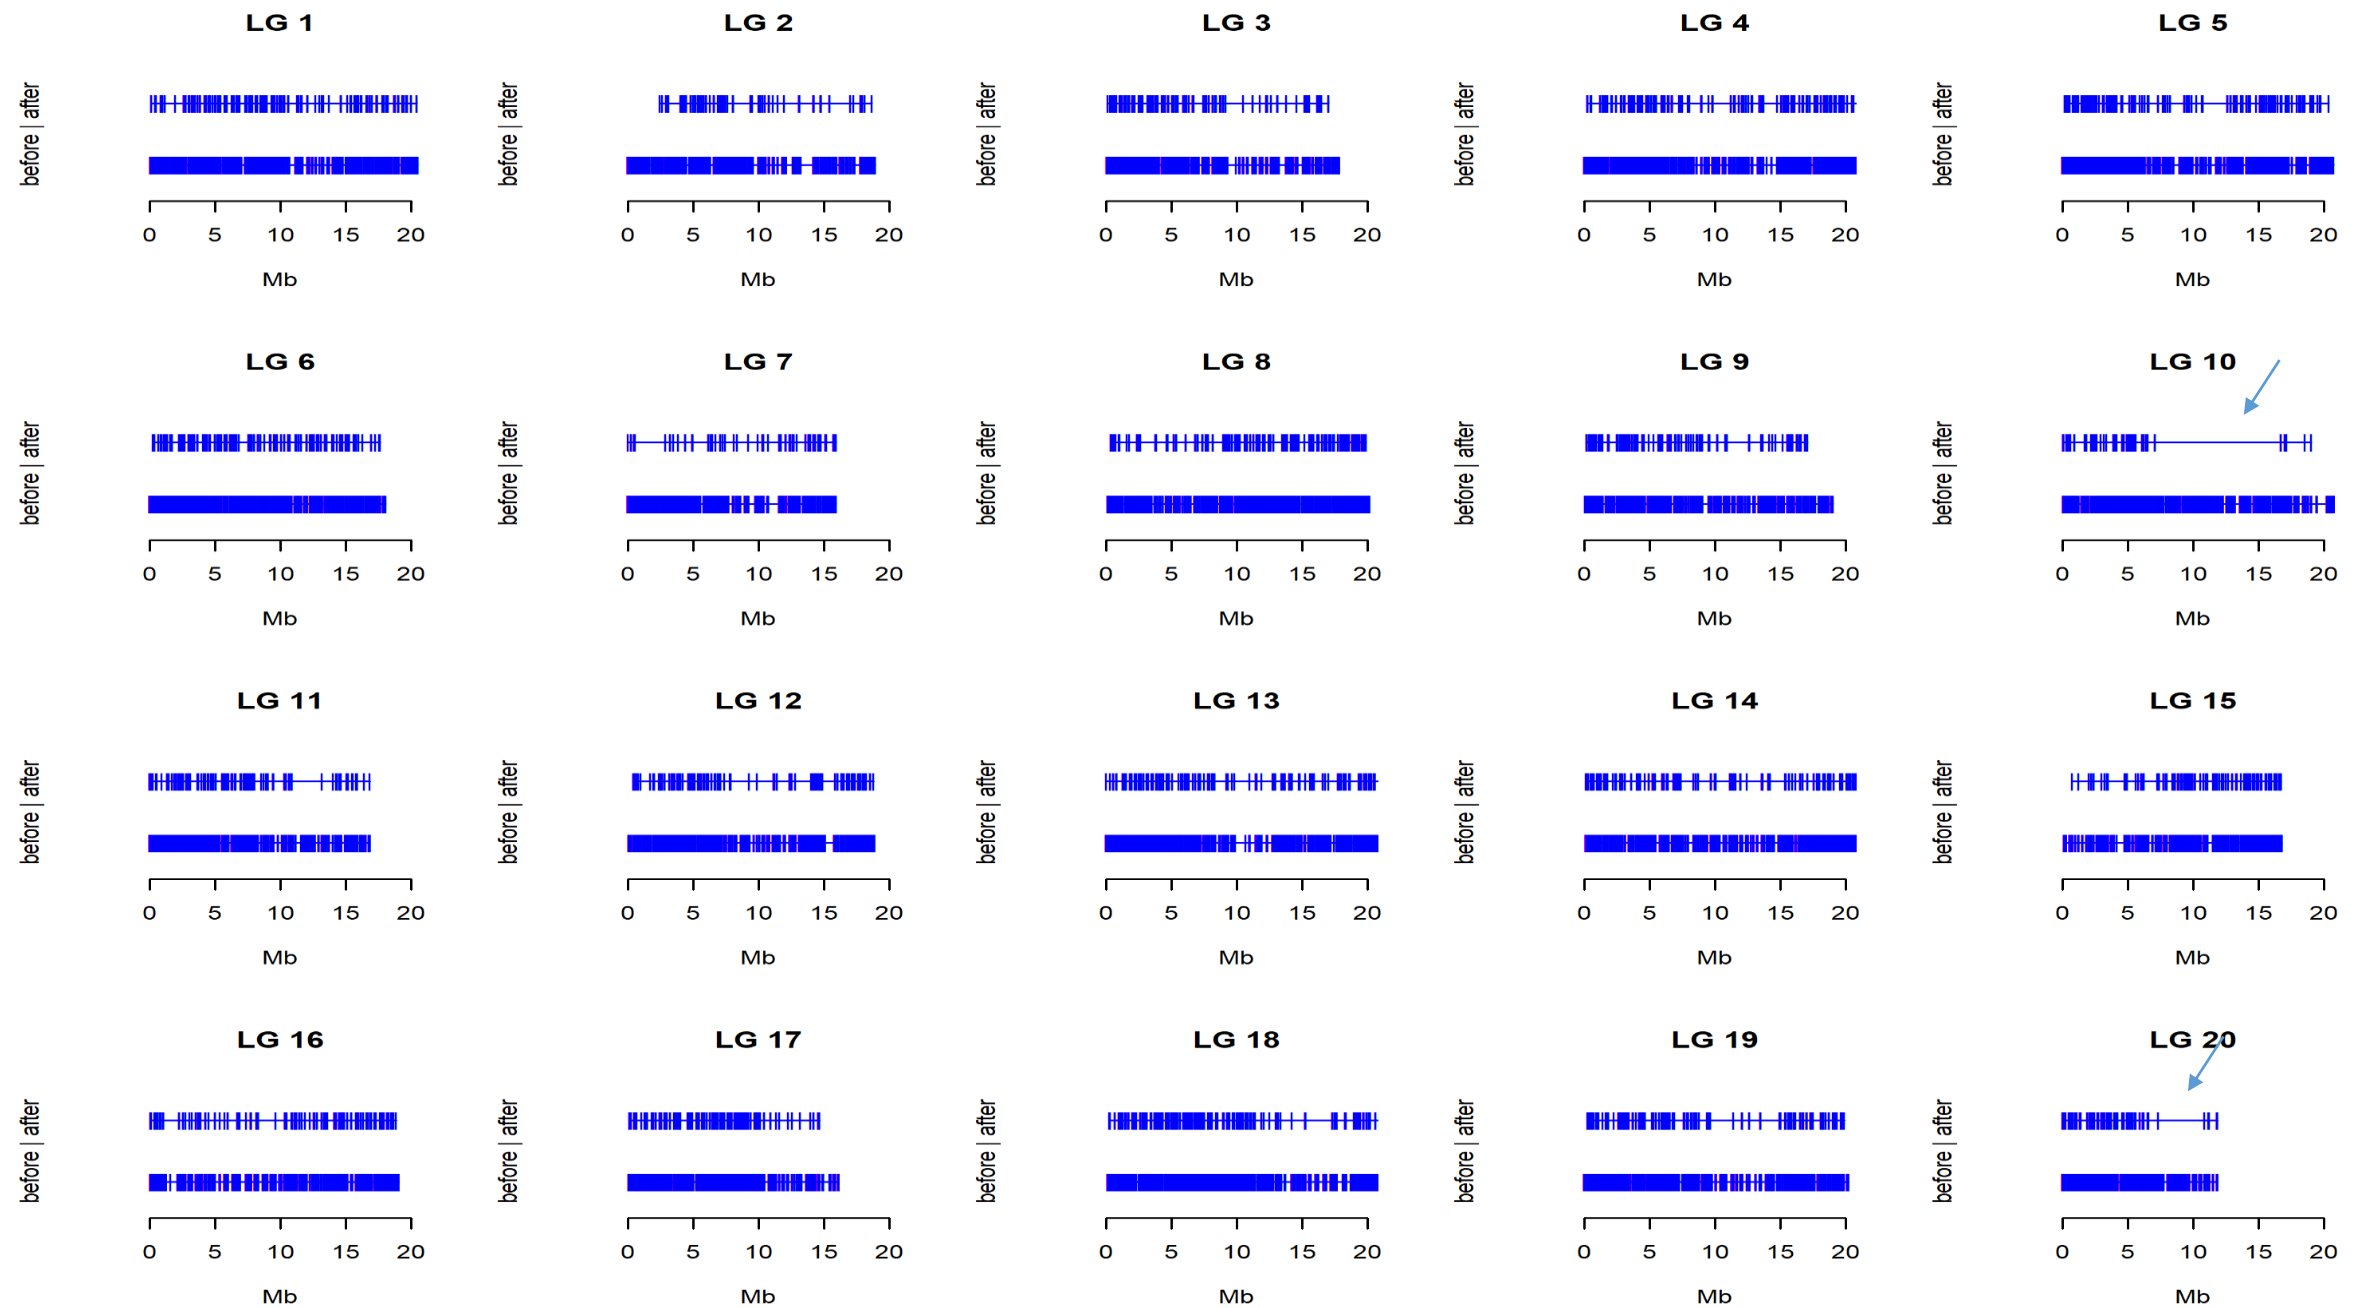

Supplementary Materials, Figure S3. Chromosome-level distribution of SNP markers before and after passing the chi-square fit test
