# Supplementary material for: Development of a High-Density Genetic Map for Muscadine Grape Using a Mapping Population from Selfing of the Perfect-Flowered Vine ‘Dixie’
Source: MDPI journal article supplement (doi:10.3390/plants11233231), 2022-11-25
Supplement: s1 [file s1]

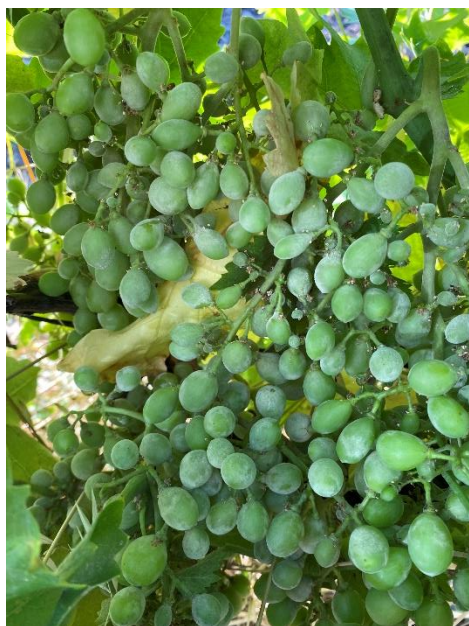

(a)

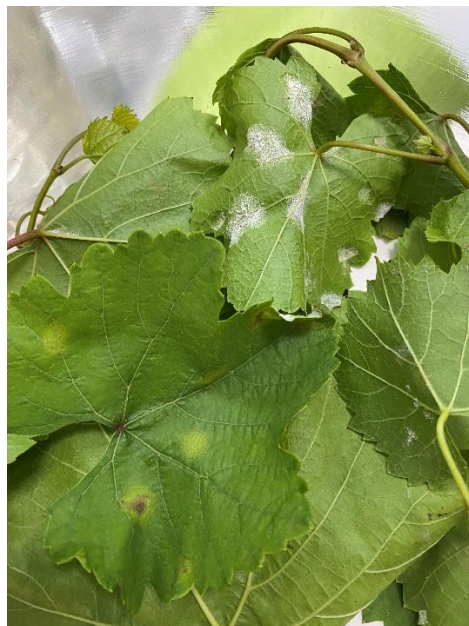

(b)

*Supplementary Materials, Figure S3.* The source of fungal conidia to prepare inoculum for the experimental infection of the 'Dixie' S1 seedlings: **(a)** The grape bunches affected by odium were collected in Livadia (the southern coast of Crimea); **(b)** leaves, infected by downy mildew collected in the Balaklava region of Crimea.
