# Supplementary figures and images for: Development of a High-Density Genetic Map for Muscadine Grape Using a Mapping Population from Selfing of the Perfect-Flowered Vine ‘Dixie’
Source: MDPI journal article supplement (doi:10.3390/plants11233231), 2022-11-25

Supplementary Materials, Figure S2: MapCart of the linkage map of *M. rotundifolia* cv. Dixie

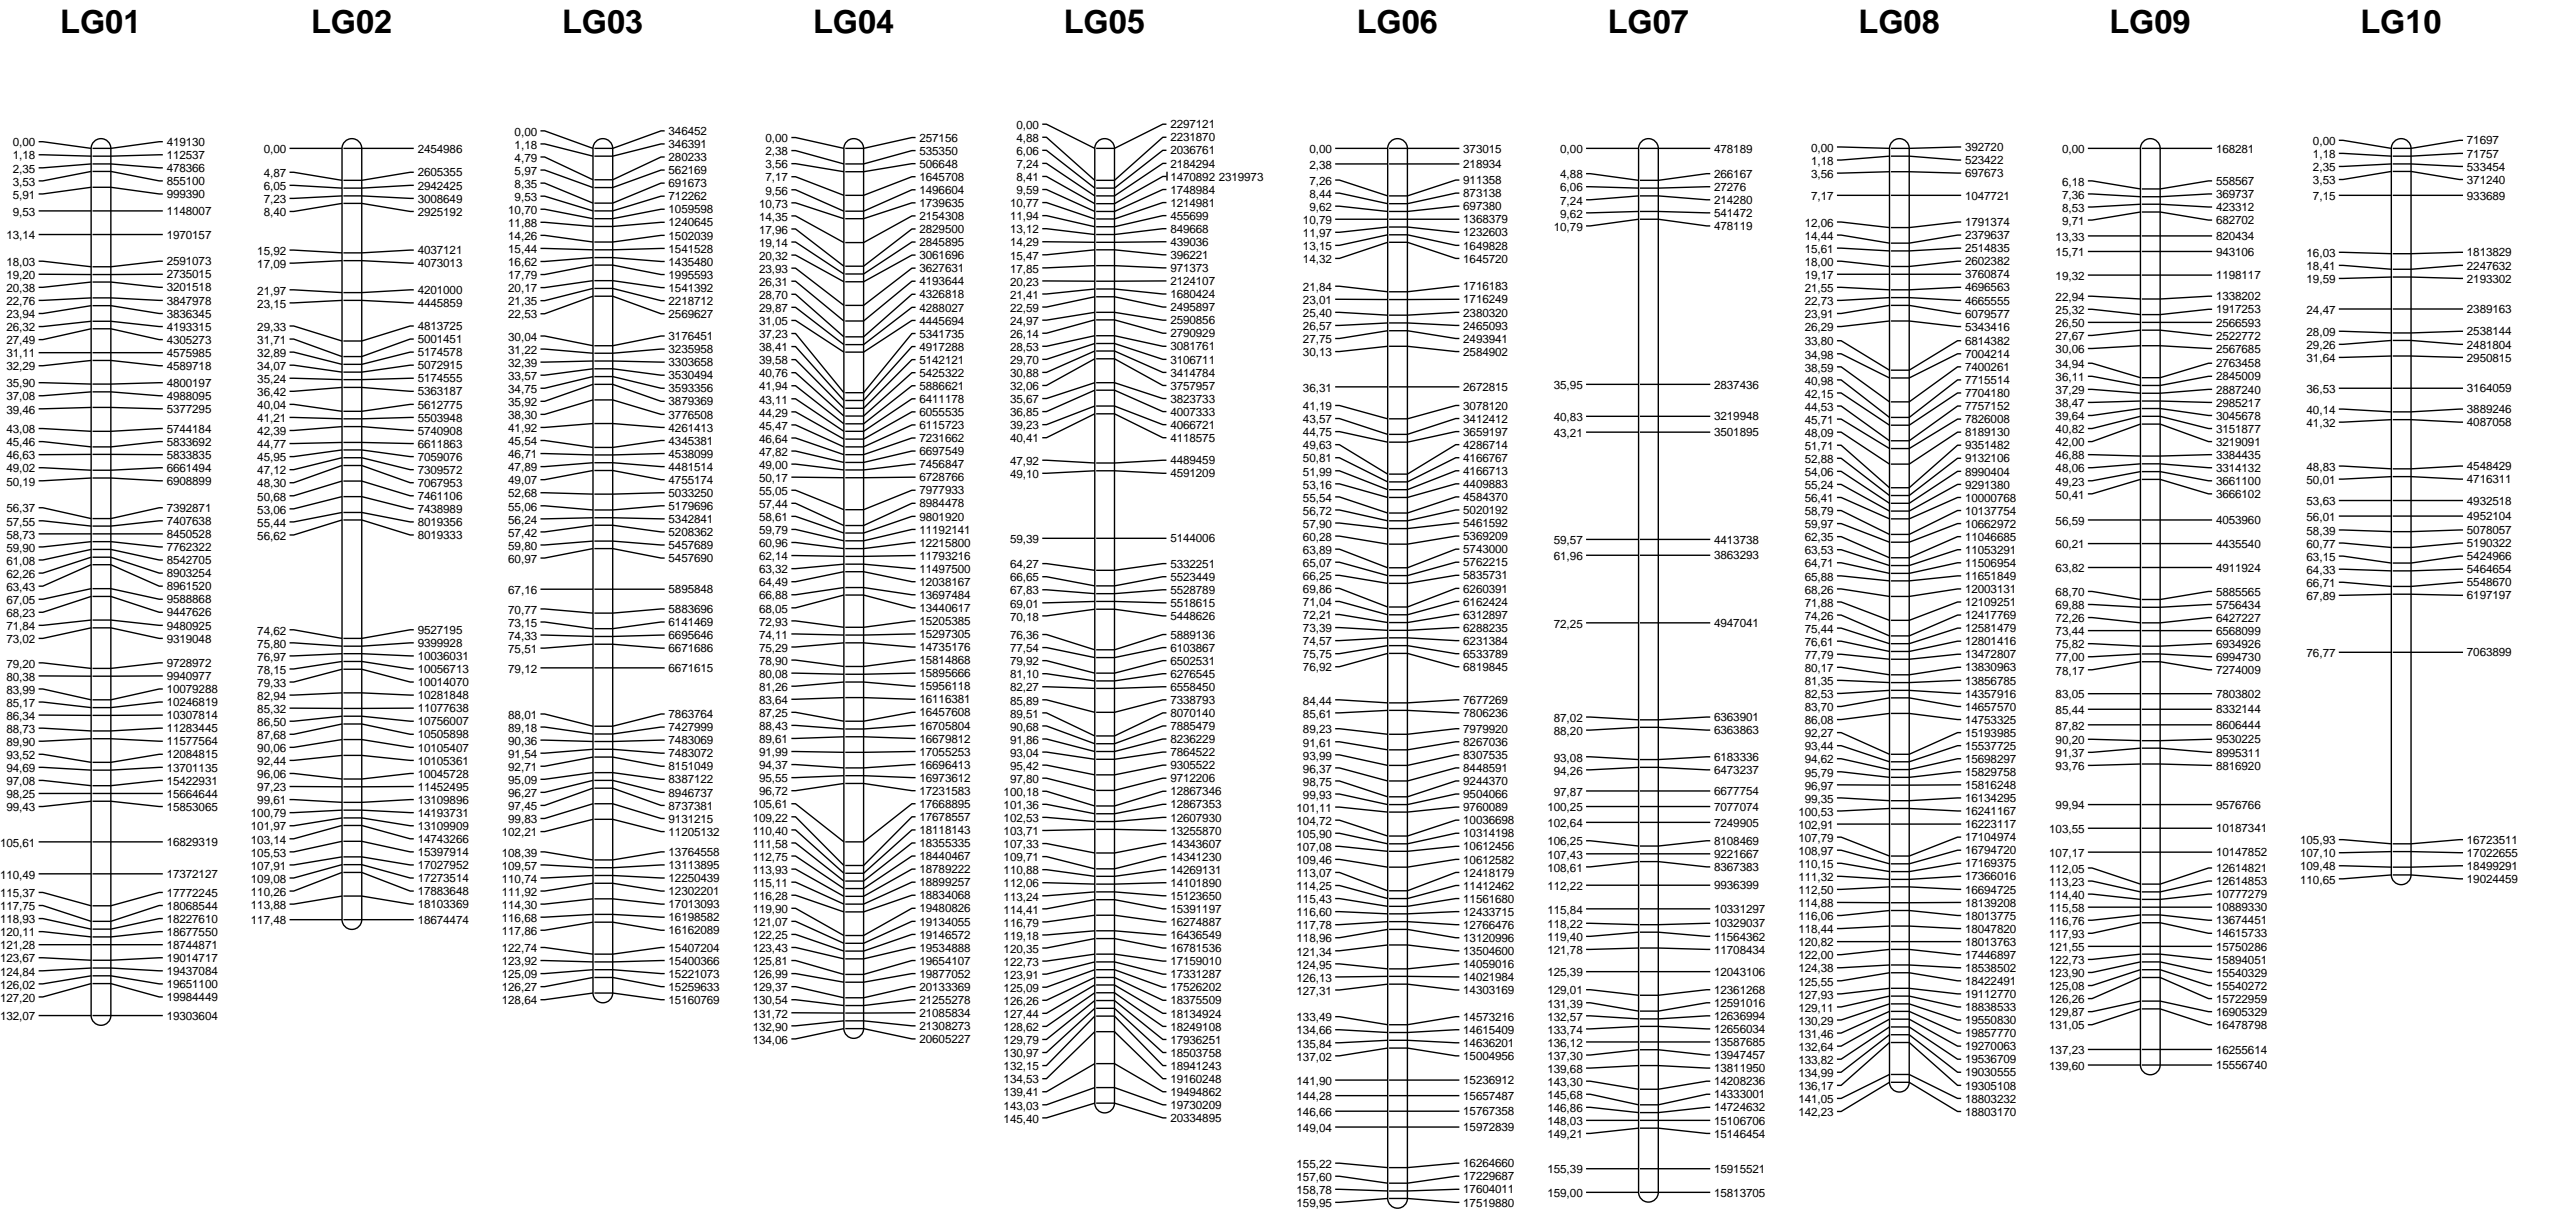

# LG20

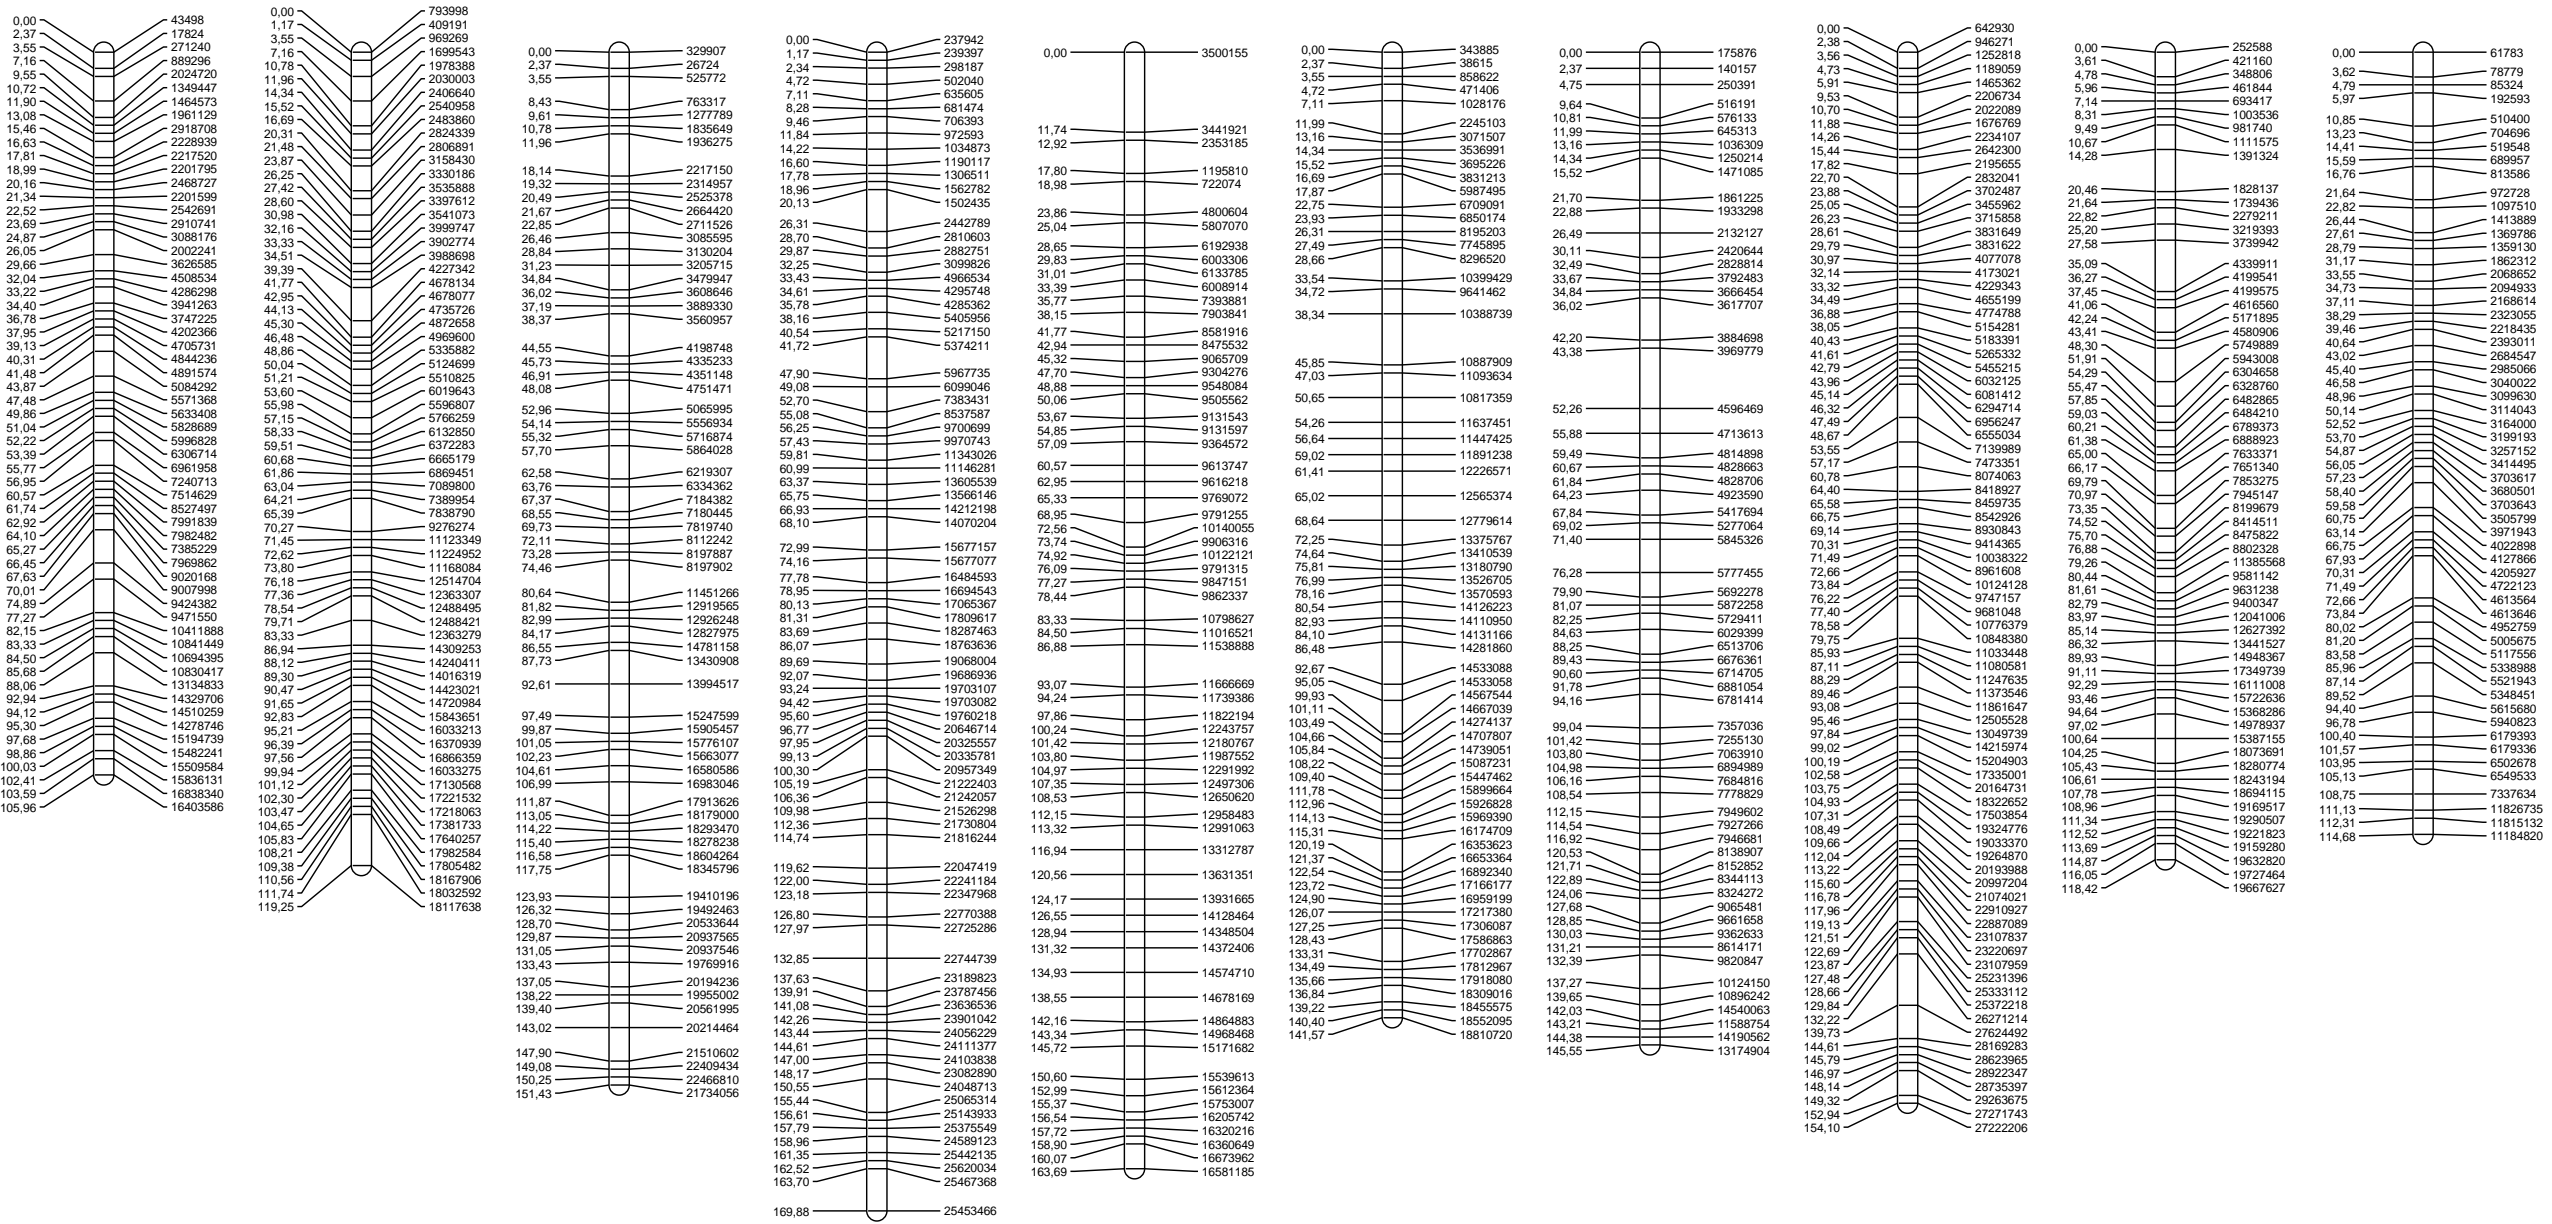

Supplement: s1 [file s1]
